# Supplementary material for: Frühe Prädiktoren der Sprachentwicklung von Kindern mit permanenter Hörstörung
Source: Atypon-hosted journal article supplement (doi:10.1026/0942-5403/a000325), 2021-01-01
Supplement: 0942-5403_a000325_esm1.pdf [file 0942-5403_a000325_esm1.pdf]

# Elektronisches Supplement

## Elektronisches Supplement 1. Suchstrategie Pubmed

1. (child\*[tiab] OR toddler\*[tiab] OR paediatric\*[tiab] OR pediatric\* [tiab] OR baby [tiab] OR babies [tiab] OR infant\* [tiab] OR pre-school\* [tiab] OR child [MeSH] OR paediatric [MeSH] OR pediatric [MeSH] OR baby [MeSH] OR infant [MeSH]) AND ((deaf\*[tiab]) OR ((hear\*) AND (loss\*[tiab] OR impairment\*[tiab]))) OR (Deafness [MeSH] OR "Hearing Impairment" [MeSH] OR "Hearing Loss"[MeSH])
2. ((speech [tiab] OR speech [MeSH] OR speak\* [tiab] OR voc\* [tiab] OR verbal\* [tiab] OR languag\* [tiab] OR communicat\* [tiab] OR convers\* [tiab] OR talk\* [tiab]) AND (percept\* [tiab] OR produc\* [tiab] OR develop\* [tiab] OR skill\* [tiab] OR perform\* [tiab] OR comprehend\* [tiab] OR progress\* [tiab] OR recog\* [tiab] OR acquis\* [tiab] OR intelligibilit\* [tiab] OR reprod\* [tiab] OR communicat\* [tiab] OR reason\* [tiab] OR sign\*[tiab] AND (language[tiab] OR support\*[tiab])) OR "Language Development" [MeSH] OR "Speech Perception" [MeSH] OR "Speech Intelligibility" [MeSH]) OR ((expressiv\*[tiab] OR receptiv\* [tiab] OR auditor\* [tiab] OR hear\* [tiab] AND (languag\* [tiab] OR skill\* [tiab]) OR "Child Language" [MeSH] OR "Verbal Behavior" [MeSH] OR "Language Tests" [MeSH] OR "Sign supported Speech" [MeSH] OR "Simultaneous Communication" [MeSH] OR "Total Communication" [MeSH])
3. (((famil\*[tiab] OR Family [MeSH]) AND (environment\*[tiab] OR participat\*[tiab] OR support\*[tiab] OR background\*[tiab] OR dynamic\*[tiab] OR intervention\*[tiab] OR size[tiab] OR expect\*[tiab] OR climate[tiab] OR health [tiab])) OR "Family Environment" [MeSH] OR "Family Characteristics" [MeSH] OR "Family Health" [MeSH]) OR ((parent\*[tiab]) AND (utterance[tiab] OR stress[tiab])) OR ((matern\*[tiab]) AND (education[tiab] OR attach\*[tiab] OR sensitive\*[tiab] OR react\*[tiab] or self-efficacy[tiab])) OR ("Socio-economic status" [MeSH] OR "Socioeconomic Factors" [MeSH] OR "Parent-Child Relations" [MeSH] OR "Social Environment" [MeSH] OR "Educational Status" [MeSH] OR "Social Support" [MeSH] OR screen\*[tiab] AND time[tiab] OR "Screen Time"[MeSH] OR multilingual\*[tiab] OR "Multilingual\*[MeSH])
4. predict\*[tiab] OR "Early predictor"[MeSH] OR influence\*[tiab]

#1 AND #2 AND #3 AND #4
