# Supplementary material for: Frühe Prädiktoren der Sprachentwicklung von Kindern mit permanenter Hörstörung
Source: Atypon-hosted journal article supplement (doi:10.1026/0942-5403/a000325), 2021-01-01
Supplement: 0942-5403_a000325_esm2.pdf [file 0942-5403_a000325_esm2.pdf]

**Elektronisches Supplement 2:** Exemplarische Darstellung nicht-syndromaler Hörstörungen mit überwiegend konnatalem Onset und Beginn i.d.R. vor einem Alter von 3 Jahren. Es werden sowohl der Locus als auch das Gen und eine Kurzfassung des Phänotyps angeführt. Zusätzlich erfolgt die Angabe, inwieweit Veränderungen im entsprechenden Gen auch zu syndromalen Phänotypen führen können. In Anlehnung an die Einteilung von Toriello und Smith aus dem Buch „Hereditary Hearing Loss and its Syndromes“ Third Edition.

Abkürzungen: EVA – enlarged vestibular aqueduct; AN – auditorische Neuropathie; LJ – Lebensjahr; IAC – internal auditory channel; i.d.R. – in der Regel

| Autosomal Rezessiv (Beginn ≤ 3LJ) |                |                                                                                                                                                          |                 | Autosomal Dominant (Beginn ≤ 3LJ)   |                                                                                                                                                                                                    |                                                                                                                                                                                                                                                        |                                 |
|-----------------------------------|----------------|----------------------------------------------------------------------------------------------------------------------------------------------------------|-----------------|-------------------------------------|----------------------------------------------------------------------------------------------------------------------------------------------------------------------------------------------------|--------------------------------------------------------------------------------------------------------------------------------------------------------------------------------------------------------------------------------------------------------|---------------------------------|
| Lokus                             | Gen            | Typischer Phänotyp                                                                                                                                       | Syndr. Phänotyp | Lokus                               | Gen/Protein                                                                                                                                                                                        | Typischer Phänotyp                                                                                                                                                                                                                                     | Syndr. Phänotyp                 |
| DFNB1A                            | <i>GJB2</i>    | Kongenital (95%), oft nicht progredient, pantonal, mittel bis hochgradig; vestibuläre Beteiligung möglich                                                | PPK, KID        | DFNA3A                              | <i>GJB2</i>                                                                                                                                                                                        | Kongenital, nicht progredient, pantonal abfallend, mittel bis hochgradig; keine vestibuläre Beteiligung                                                                                                                                                | -                               |
| DFNB1B                            | <i>GJB6</i>    | Prälingual, fraglich progredient, pantonal, hochgradig; keine vestibuläre Beteiligung beschrieben                                                        | -               | DFNA6/14/38                         | <i>WFS1</i>                                                                                                                                                                                        | Prälingual, progredient, tiefton dann mittlere Frequenzen, mittel bis hochgradig; keine relevante vestibuläre Beteiligung                                                                                                                              | Wolfram Syndrom Typ1            |
| DFNB2                             | <i>MYO7A</i>   | Variabler Beginn (kongenital bis 16. LJ), progredient, pantonal, und hochgradig; nicht unbeträchtlicher Anteil mit vestibulärer Dysfunktion;             | Usher 1B        | DFNA8/12                            | <i>TECTA</i>                                                                                                                                                                                       | Prälingual, nicht progredient, pantonal bis leicht U förmig, mittel bis hochgradig; keine vestibuläre Beteiligung                                                                                                                                      | -                               |
| DFNB3                             | <i>MYO15A</i>  | Kongenital, nicht progredient, hochgradig; keine vestibuläre Beteiligung;                                                                                | -               | DFNA13                              | <i>COL11A2</i>                                                                                                                                                                                     | Prälingual, selten progredient, beginnend mittlere Frequenzen dann pantonal, mittel bis hochgradig, in ca. 1/3 vestibuläre Dysfunktion                                                                                                                 | Mb. Stickler, Kneist; SED OSMED |
| DFNB4                             | <i>SLC26A4</i> | Kongenital, progredient, fluktuierend, hohe Variabilität, initial v.a. hochton; häufig EVA oder Mondini Malformation, dann auch vestibuläre Dysfunktion; | Pendred         | DFNA23                              | <i>SIX1</i>                                                                                                                                                                                        | Prälingual, nicht progredient, pantonal abfallend, mittel bis hochgradig; keine vestibuläre Beteiligung berichtet                                                                                                                                      | BOS Typ 3                       |
| DFNB6                             | <i>TMIE</i>    | Kongenital, nicht progredient, pantonal, hochgradig; vestibuläre Beteiligung ev. möglich;                                                                | -               | DFNA40                              | <i>CRYM</i>                                                                                                                                                                                        | Beginn 1-2LJ, manchmal progredient, hochton, hochgradig; keine vestibuläre Beteiligung berichtet                                                                                                                                                       | -                               |
| DFNB7/11                          | <i>TMC1</i>    | Kongenital, selten progredient, pantonal, hochgradig; keine vestibuläre Beteiligung                                                                      | -               | <b>X Chromosomal (Beginn ≤ 3LJ)</b> |                                                                                                                                                                                                    |                                                                                                                                                                                                                                                        |                                 |
| DFNB8/10                          | <i>TMPRSS3</i> | Kongenital, nicht progredient, pantonal, hochgradig; keine vestibuläre Beteiligung                                                                       | -               | Lokus                               | Gen/Protein                                                                                                                                                                                        | Typischer Phänotyp                                                                                                                                                                                                                                     |                                 |
| DFNB9                             | <i>OTOF</i>    | Kongenital, nicht progredient, pantonal bis AN, hochgradig; keine vestibuläre Beteiligung                                                                | -               | DFNX1                               | <i>PRPS1</i>                                                                                                                                                                                       | ♂: Kongenital bis postlingual, nicht selten progredient, pantonal, hochgradig; keine vestibuläre Beteiligung<br>♀: Variabler Beginn, nicht selten progredient, hochton, leicht bis mittelgradig; keine vestibuläre Beteiligung                         |                                 |
| DFNB12                            | <i>CDH23</i>   | Kongenital, oft nicht progredient, hochton bis pantonal, mittel bis hochgradig; keine vestibuläre Beteiligung                                            | Usher 1D        | DFNX2                               | <i>POU3F4</i>                                                                                                                                                                                      | ♂: Kongenital, progredient, pantonal, mittel bis hochgradig; vestibuläre Dysfunktion; Dilataion IAC, EVA, Gusher Risiko<br>♀: Kongenital oder postlingual, nicht selten progredient, pantonal, leicht bis mittelgradig; keine vestibuläre Beteiligung; |                                 |
| DFNB15/72/95                      | <i>GIPC3</i>   | Prälingual, oft nicht progredient, pantonal, hochgradig; keine vestibuläre Beteiligung                                                                   | -               | <b>Mitochondrial (Beginn ≤ 3LJ)</b> |                                                                                                                                                                                                    |                                                                                                                                                                                                                                                        |                                 |
| DFNB16                            | <i>STRC</i>    | Variabler Beginn meist 3-5 LJ, nicht progredient, pantonal abfallend, hochgradig; vestibuläre Beteiligung nicht berichtet                                | -               | Gen/Protein                         | Typischer Phänotyp                                                                                                                                                                                 |                                                                                                                                                                                                                                                        |                                 |
|                                   |                |                                                                                                                                                          |                 | <i>MT-RNR1</i>                      | Maternal vererbt; oft Aminoglykosid assoziiert; Tage bis Wochen nach Aminoglykosid Gabe (relativ dosisunabhängig); beidseitig, hochgradig, nicht progredient; i.d.R. keine vestibuläre Beteiligung |                                                                                                                                                                                                                                                        |                                 |
| DFNB18                            | <i>USH1C</i>   | Prälingual, nicht progredient, pantonal, hochgradig; keine vestibuläre Beteiligung                                                                       | Usher 1C        | <i>MT-TS1</i>                       | Selten Prälingual, meist progredient, variabler Schweregrad; bei gewissen Varianten auch syndromale Aspekte mit PPK                                                                                |                                                                                                                                                                                                                                                        |                                 |
| DFNB21                            | <i>TECTA</i>   | Prälingual, nicht progredient, pantonal, typischerweise U förmig, mittel bis hochgradig; vestibuläre Beteiligung nicht berichtet                         | -               | <i>MT-CO1</i>                       | Maternal vererbt; oft Aminoglykosid assoziiert; Tage bis Wochen nach Aminoglykosid Gabe (relativ dosisunabhängig); beidseitig, hochgradig, nicht progredient; i.d.R. keine vestibuläre Beteiligung |                                                                                                                                                                                                                                                        |                                 |
