# Supplementary material for: Frühe Prädiktoren der Sprachentwicklung von Kindern mit permanenter Hörstörung
Source: Atypon-hosted journal article supplement (doi:10.1026/0942-5403/a000325), 2021-01-01
Supplement: 0942-5403_a000325_esm4.pdf [file 0942-5403_a000325_esm4.pdf]

#### Elektronisches Supplement 4: Studien zu familiären Prädiktoren

| Autoren                         | Jahr | Design       | N   | Alter (in Jahren) | Geschlecht % Mädchen | Familienvariable         | Sprachvariable                                         | Ergebnisse                |
|---------------------------------|------|--------------|-----|-------------------|----------------------|--------------------------|--------------------------------------------------------|---------------------------|
| <b>Elterlicher Sprachinput</b>  |      |              |     |                   |                      |                          |                                                        |                           |
| Ceh et al.                      | 2013 | Querschnitt  | 39  | 5,78 (1,44)       | 56                   | Elterlicher Sprachinput  | Global rezeptiv                                        | Signifikant positiv       |
| Cruz et al.                     | 2013 | Longitudinal | 93  | 1,22 (0,48)       | 46                   | Elterlicher Sprachinput  | Global expressiv                                       | Signifikant positiv       |
| DesJardin & Eisenberg           | 2007 | Querschnitt  | 32  | 4,8               | 50                   | Elterlicher Sprachinput  | Global expressiv + rezeptiv (MLU+Wortarten)            | Signifikant positiv       |
| DesJardin et al.                | 2009 | Longitudinal | 16  | 4,42 (1,05)       | 56                   | Elterlicher Sprachinput  | Wortschatz expressiv                                   | Signifikant positiv       |
| Rüter                           | 2011 | Longitudinal | 21  | k.A.              | 52                   | Elterlicher Sprachinput  | Grammatik expressiv                                    | Signifikant positiv       |
| Szagun & Schramm                | 2016 | Longitudinal | 48  | k.A.              | 50                   | Elterlicher Sprachinput  | Grammatik expressiv                                    | Signifikant positiv       |
| Szagun & Stumper                | 2012 | Longitudinal | 25  | k.A.              | 48                   | Elterlicher Sprachinput  | Wortschatz expressiv<br>Grammatik expressiv + rezeptiv | Signifikant positiv       |
| <b>Familiäre Involviertheit</b> |      |              |     |                   |                      |                          |                                                        |                           |
| Boons et al.                    | 2012 | Querschnitt  | 288 | k.A.              | 47                   | Familiäre Involviertheit | Wortschatz expressiv<br>Global rezeptiv                | Signifikant positiv       |
| Yanbay et al.                   | 2014 | Longitudinal | 42  | 4,65-4,86         | 55                   | Familiäre Involviertheit | Global expressiv + rezeptiv                            | Signifikant positiv       |
| Boons et al.                    | 2013 | Querschnitt  | 70  | 8,2               | 56                   | Familiäre Involviertheit | Wortschatz                                             | Signifikant positiv       |
| Geers et al.                    | 2003 | Querschnitt  | 181 | 8,11 (0,6)        | 50                   | Familiäre Involviertheit | Global expressiv                                       | Nicht signifikant positiv |
| Moreno-Torres et al.            | 2016 | Longitudinal | 14  | k.A.              | 36                   | Familiäre Involviertheit | Wortschatz expressiv                                   | Signifikant positiv       |

#### Elektronisches Supplement 4: Studien zu familiären Prädiktoren

|                                 |      |              |     |             |                             |                                            |                                 |                     |
|---------------------------------|------|--------------|-----|-------------|-----------------------------|--------------------------------------------|---------------------------------|---------------------|
| Sarant & Garrard                | 2014 | Querschnitt  | 70  | 6,6 (1,4)   | 49                          | Familiäre Involviertheit                   | Global expressiv + rezeptiv     | Signifikant positiv |
| Sarant et al.                   | 2009 | Querschnitt  | 57  | k.A.        | 44                          | Familiäre Involviertheit                   | Global expressiv + rezeptiv     | Signifikant positiv |
| Elternbelastung                 |      |              |     |             |                             |                                            |                                 |                     |
| Blank et al.                    | 2020 | Querschnitt  | 39  | 6,45-6,8    | 49                          | Elternbelastung                            | Global rezeptiv                 | Signifikant negativ |
| Sarant & Garrard                | 2014 | Querschnitt  | 70  | 6,6 (1,4)   | 49                          | Elternbelastung                            | Global expressiv + rezeptiv     | Signifikant negativ |
| Vohr et al.                     | 2010 | Querschnitt  | 31  | 1,83        | 39                          | Elternbelastung                            | Wortschatz expressiv + rezeptiv | Signifikant negativ |
| Quittner et al.                 | 2010 | Querschnitt  | 181 | k.A.        | k.A.                        | Elternbelastung                            | Global expressiv + rezeptiv     | Signifikant negativ |
| Erziehungsstil                  |      |              |     |             |                             |                                            |                                 |                     |
| Quittner et al.                 | 2013 | Longitudinal | 188 | 2,22 (1,21) | 52                          | Erziehungsstil                             | Global expressiv + rezeptiv     | Signifikant positiv |
| Ketelaar et al.                 | 2017 | Querschnitt  | 46  | 3,14 (1,18) | 39                          | Erziehungsstil (negativ+uninvolviert)      | Global rezeptiv                 | Signifikant negativ |
| Holt et al.                     | 2013 | Querschnitt  | 59  | 3,3 (1,2)   | Vorschule: 35<br>Schule: 49 | Erziehungsstil (<Kontrolle, >Organisation) | Wortschatz rezeptiv             | Signifikant positiv |
| Sozio-ökonomischer Status (SES) |      |              |     |             |                             |                                            |                                 |                     |
| Ceh et al.                      | 2013 | Querschnitt  | 39  | 5,78 (0,3)  | 56                          | SES                                        | Global rezeptiv                 | Nicht signifikant   |
| Chen et al.                     | 2015 | Querschnitt  | 115 | 4,16 (1,05) | k.A.                        | SES                                        | Wortschatz expressiv            | Signifikant positiv |
| Cuda et al.                     | 2014 | Querschnitt  | 30  | 3           | 57                          | SES                                        | Grammatik expressiv             | Signifikant positiv |

#### Elektronisches Supplement 4: Studien zu familiären Prädiktoren

|                      |      |              |     |             |       |     |                             |                           |
|----------------------|------|--------------|-----|-------------|-------|-----|-----------------------------|---------------------------|
| Cupples et al.       | 2018 | Querschnitt  | 49  | k.A.        | k.A.  | SES | Global expressiv            | Nicht signifikant positiv |
| DesJardin et al.     | 2009 | Longitudinal | 16  | 4,42 (1,05) | 56    | SES | Wortschatz expressiv        | Nicht signifikant         |
| Geers et al.         | 2009 | Querschnitt  | 153 | 5,1 (0,6)   | k.A.  | SES | Global expressiv + rezeptiv | Signifikant positiv       |
| Geers et al. 2011    | 2011 | Longitudinal | 112 | 16,7 (0,6)  | 53    | SES | Global expressiv + rezeptiv | Signifikant positiv       |
| Guerzoni et al.      | 2016 | Querschnitt  | 28  | 2,16 (0,38) | 46    | SES | Wortschatz expressiv        | Nicht signifikant positiv |
| Holt & Svirsky       | 2008 | Longitudinal | 96  | k.A.        | 41-50 | SES | Wortschatz rezeptiv         | Signifikant positiv       |
| Huber & Kipman       | 2012 | Querschnitt  | 40  | 10,1 (1,3)  | 53    | SES | Wortschatz expressiv        | Nicht signifikant positiv |
| Ketelaar et al.      | 2017 | Querschnitt  | 46  | 3,14 (1,18) | 39    | SES | Global expressiv            | Nicht signifikant negativ |
| Moreno-Torres et al. | 2016 | Longitudinal | 14  | k.A.        | 36    | SES | Wortschatz expressiv        | Nicht signifikant positiv |
| Quittner et al.      | 2013 | Longitudinal | 188 | 2,22 (1,21) | 52    | SES | Global expressiv + rezeptiv | Signifikant positiv       |
| Sarant & Garrard     | 2014 | Querschnitt  | 70  | 6,6 (1,4)   | 49    | SES | Global expressiv + rezeptiv | Nicht signifikant negativ |
| Szagun & Stumper     | 2012 | Longitudinal | 25  | k.A.        | 50    | SES | Wortschatz expressiv        | Signifikant positiv       |

## Elektronisches Supplement 4: Studien zu familiären Prädiktoren

|               |      |              |    |           |    |     |                  |                           |
|---------------|------|--------------|----|-----------|----|-----|------------------|---------------------------|
| Yanbay et al. | 2014 | Longitudinal | 42 | 4,65-4,86 | 55 | SES | Global expressiv | Nicht signifikant positiv |
|---------------|------|--------------|----|-----------|----|-----|------------------|---------------------------|

SES=Sozio-ökonomischer Status; k.A.= keine Angabe; N=Samplegröße

### Literaturverzeichnis Studien zu familiären Prädiktoren

Blank, A., Frush Holt, R., Pisoni, D. B. & Kronenberger, W. G. (2020). Associations Between Parenting Stress, Language Comprehension, and Inhibitory Control in Children With Hearing Loss. *Journal of speech, language, and hearing research*, 63, 321–333.

Boons, T., Brokx, J. P., Dhooge, I., Frijns, J. H., Peeraer, L., Vermeulen, A. et al. (2012). Predictors of spoken language development following pediatric cochlear implantation. *Ear and hearing*, 33, 617–639.

Boons, T., DeRaeve, L., Langereis, M., Peeraer, L., Wouters, J. & van Wieringen, A. (2013). Expressive vocabulary, morphology, syntax and narrative skills in profoundly deaf children after early cochlear implantation. *Research in developmental disabilities*, 34, 2008–2022.

Ceh, K. M., Bervinchak, D. M. & Francis, H. W. (2013). Early literacy gains in children with cochlear implants. *Otology & neurotology : official publication of the American Otological Society, American Neurotology Society [and] European Academy of Otology and Neurotology*, 34, 416–421.

Chen, Y., Wong, L. L., Zhu, S. & Xi, X. (2015). A Structural Equation Modeling Approach to Examining Factors Influencing Outcomes with Cochlear Implant in Mandarin-Speaking Children. *PloS one* 10, e0136576.

Cruz, I., Quittner, A. L., Marker, C. & DesJardin, J. L. (2013). Identification of effective strategies to promote language in deaf children with cochlear implants. *Child development*, 84, 543–559.

Cuda, D., Murri, A., Guerzoni, L., Fabrizi, E. & Mariani, V. (2014). Pre-school children have better spoken language when early implanted. *International journal of pediatric otorhinolaryngology*, 78, 1327–1331.

#### Elektronisches Supplement 4: Studien zu familiären Prädiktoren

- Cupples, L., Ching, T. Y., Button, L., Leigh, G., Marnane, V., Whitfield, J. et al. (2018). Language and speech outcomes of children with hearing loss and additional disabilities: identifying the variables that influence performance at five years of age. *International journal of audiology*, 57 (sup2), 93-104.
- DesJardin, J. L., Ambrose, S. E. & Eisenberg, L. S. (2009). Literacy skills in children with cochlear implants: the importance of early oral language and joint storybook reading. *Journal of deaf studies and deaf education*, 14, 22–43.
- DesJardin, J. L. & Eisenberg, L. S. (2007). Maternal contributions: supporting language development in young children with cochlear implants. *Ear and hearing*, 28, 456–469.
- Geers, A. E., Moog, J. S., Biedenstein, J., Brenner, C. & Hayes, H. (2009). Spoken language scores of children using cochlear implants compared to hearing age-mates at school entry. *Journal of deaf studies and deaf education*, 14, 371–385.
- Geers, A. E., Nicholas, J. G. & Sedey, A. L. (2003). Language skills of children with early cochlear implantation. *Ear and hearing*, 24 (1 Suppl), 46-58.
- Geers, A. E., Strube, M. J., Tobey, E. A., Pisoni, D. B. & Moog, J. S. (2011). Epilogue: factors contributing to long-term outcomes of cochlear implantation in early childhood. *Ear and hearing*, 32 (1 Suppl), 84-92.
- Guerzoni, L., Murri, A., Fabrizi, E., Nicastrì, M., Mancini, P. & Cuda, D. (2016). Social conversational skills development in early implanted children. *The Laryngoscope*, 126, 2098–2105.
- Holt, R. F., Beer, J., Kronenberger, W. G. & Pisoni, D. B. (2013). Developmental effects of family environment on outcomes in pediatric cochlear implant recipients. *Otology & neurotology : official publication of the American Otological Society, American Neurotology Society [and] European Academy of Otology and Neurotology*, 34, 388–395.
- Holt, R. F. & Svirsky, M. A. (2008). An exploratory look at pediatric cochlear implantation: is earliest always best? *Ear and hearing*, 29, 492–511.
- Huber, M. & Kipman, U. (2012). Cognitive skills and academic achievement of deaf children with cochlear implants. *Otolaryngology--head and neck surgery : official journal of American Academy of Otolaryngology-Head and Neck Surgery*, 147, 763–772.
- Ketelaar, L., Wiefferink, C. H., Frijns, J. H. & Rieffe, C. (2017). Children With Cochlear Implants and Their Parents: Relations Between Parenting Style and Children's Social-Emotional Functioning. *Ear and hearing*, 38, 321–331.

#### Elektronisches Supplement 4: Studien zu familiären Prädiktoren

- Moreno-Torres, I., Madrid-Cánovas, S. & Blanco-Montañez, G. (2016). Sensitive periods and language in cochlear implant users. *Journal of child language*, 43, 479–504.
- Quittner, A. L., Barker, D. H., Cruz, I., Snell, C., Grimley, M. E. & Botteri, M. (2010). Parenting Stress among Parents of Deaf and Hearing Children: Associations with Language Delays and Behavior Problems. *Parenting, science and practice*, 10, 136–155.
- Quittner, A. L., Cruz, I., Barker, D. H., Tobey, E., Eisenberg, L. S. & Niparko, J. K. (2013). Effects of Maternal Sensitivity and Cognitive and Linguistic Stimulation on Cochlear Implant Users' Language Development over Four Years. *The Journal of pediatrics*, 162, 343-348.
- Rüter, M. (2011). Einfluss von Expansionen auf den Grammatikerwerb von Kindern mit Cochleaimplantat. *HNO*, 59, 360–365.
- Sarant, J. & Garrard, P. (2014). Parenting stress in parents of children with cochlear implants: relationships among parent stress, child language, and unilateral versus bilateral implants. *Journal of deaf studies and deaf education*, 19, 85–106.
- Sarant, J. Z., Holt, C. M., Dowell, R. C., Rickards, F. W. & Blamey, P. J. (2009). Spoken language development in oral preschool children with permanent childhood deafness. *Journal of deaf studies and deaf education*, 14, 205–217.
- Szagun, G. & Schramm, S. A. (2016). Sources of variability in language development of children with cochlear implants: age at implantation, parental language, and early features of children's language construction. *Journal of child language*, 43, 505–536.
- Szagun, G. & Stumper, B. (2012). Age or Experience? The Influence of Age at Implantation and Social and Linguistic Environment on Language Development in Children With Cochlear Implants. *Journal of Speech Language and Hearing Research*, 55, 1640–1654.
- Vohr, B., Pierre, L. S., Topol, D., Jodoin-Krauzyk, J., Bloome, J. & Tucker, R. (2010). Association of maternal communicative behavior with child vocabulary at 18-24 months for children with congenital hearing loss. *Early human development*, 86, 255–260.
- Yanbay, E., Hickson, L., Scarinci, N., Constantinescu, G. & Dettman, S. J. (2014). Language outcomes for children with cochlear implants enrolled in different communication programs. *Cochlear implants international*, 15, 121–135.
